# Supplementary material for: Performance of a novel KRAS mutation assay for formalin-fixed paraffin embedded tissues of colorectal cancer
Source: PubMed Central journal article supplement (PMC4320212; doi:10.1186/2193-1801-4-7), 2015-01-05

# Figure S1

## Probe arrangements in a cell

|    | 1 | 2  | 3 | 4  | 5 | 6  | 7 | 8  | 9 | 10 | 11 | 12 | 13   | 14 | 15   | 16 | 17   | 18 | 19   | 20 | 21   | 22 | 23   | 24 |
|----|---|----|---|----|---|----|---|----|---|----|----|----|------|----|------|----|------|----|------|----|------|----|------|----|
| 1  |   | NC |   | NC |   | NC |   | NC |   | NC | WT |    | G12A |    | G12V |    | G12D |    | G12R |    | G12C |    | G12S |    |
| 2  |   |    |   |    |   |    |   |    |   |    |    |    |      |    |      |    |      |    |      |    |      |    |      |    |
| 3  |   | NC |   | NC |   | NC |   | NC |   | NC | NC |    | G13A |    | G13V |    | G13D |    | G13R |    | G13C |    | G13S |    |
| 4  |   |    |   |    |   |    |   |    |   |    |    |    |      |    |      |    |      |    |      |    |      |    |      |    |
| 5  |   | NC |   | NC |   | NC |   | NC |   | NC | WT |    | G12A |    | G12V |    | G12D |    | G12R |    | G12C |    | G12S |    |
| 6  |   |    |   |    |   |    |   |    |   |    |    |    |      |    |      |    |      |    |      |    |      |    |      |    |
| 7  |   | NC |   | NC |   | NC |   | NC |   | NC | NC |    | G13A |    | G13V |    | G13D |    | G13R |    | G13C |    | G13S |    |
| 8  |   |    |   |    |   |    |   |    |   |    |    |    |      |    |      |    |      |    |      |    |      |    |      |    |
| 9  |   | NC |   | NC |   | NC |   | NC |   | NC | WT |    | G12A |    | G12V |    | G12D |    | G12R |    | G12C |    | G12S |    |
| 10 |   |    |   |    |   |    |   |    |   |    |    |    |      |    |      |    |      |    |      |    |      |    |      |    |
| 11 |   | NC |   | NC |   | NC |   | NC |   | NC | NC |    | G13A |    | G13V |    | G13D |    | G13R |    | G13C |    | G13S |    |
| 12 |   |    |   |    |   |    |   |    |   |    |    |    |      |    |      |    |      |    |      |    |      |    |      |    |
| 13 |   | NC |   | NC |   | NC |   | NC |   | NC | WT |    | G12A |    | G12V |    | G12D |    | G12R |    | G12C |    | G12S |    |
| 14 |   |    |   |    |   |    |   |    |   |    |    |    |      |    |      |    |      |    |      |    |      |    |      |    |
| 15 |   | NC |   | NC |   | NC |   | NC |   | NC | NC |    | G13A |    | G13V |    | G13D |    | G13R |    | G13C |    | G13S |    |
| 16 |   |    |   |    |   |    |   |    |   |    |    |    |      |    |      |    |      |    |      |    |      |    |      |    |
| 17 |   | NC |   | NC |   | NC |   | NC |   | NC | WT |    | G12A |    | G12V |    | G12D |    | G12R |    | G12C |    | G12S |    |
| 18 |   |    |   |    |   |    |   |    |   |    |    |    |      |    |      |    |      |    |      |    |      |    |      |    |
| 19 |   | NC |   | NC |   | NC |   | NC |   | NC | NC |    | G13A |    | G13V |    | G13D |    | G13R |    | G13C |    | G13S |    |
| 20 |   |    |   |    |   |    |   |    |   |    |    |    |      |    |      |    |      |    |      |    |      |    |      |    |
| 21 |   | NC |   | NC |   | NC |   | NC |   | NC | WT |    | G12A |    | G12V |    | G12D |    | G12R |    | G12C |    | G12S |    |
| 22 |   |    |   |    |   |    |   |    |   |    |    |    |      |    |      |    |      |    |      |    |      |    |      |    |
| 23 |   | NC |   | NC |   | NC |   | NC |   | NC | NC |    | G13A |    | G13V |    | G13D |    | G13R |    | G13C |    | G13S |    |
| 24 |   |    |   |    |   |    |   |    |   |    |    |    |      |    |      |    |      |    |      |    |      |    |      |    |

## Array slide

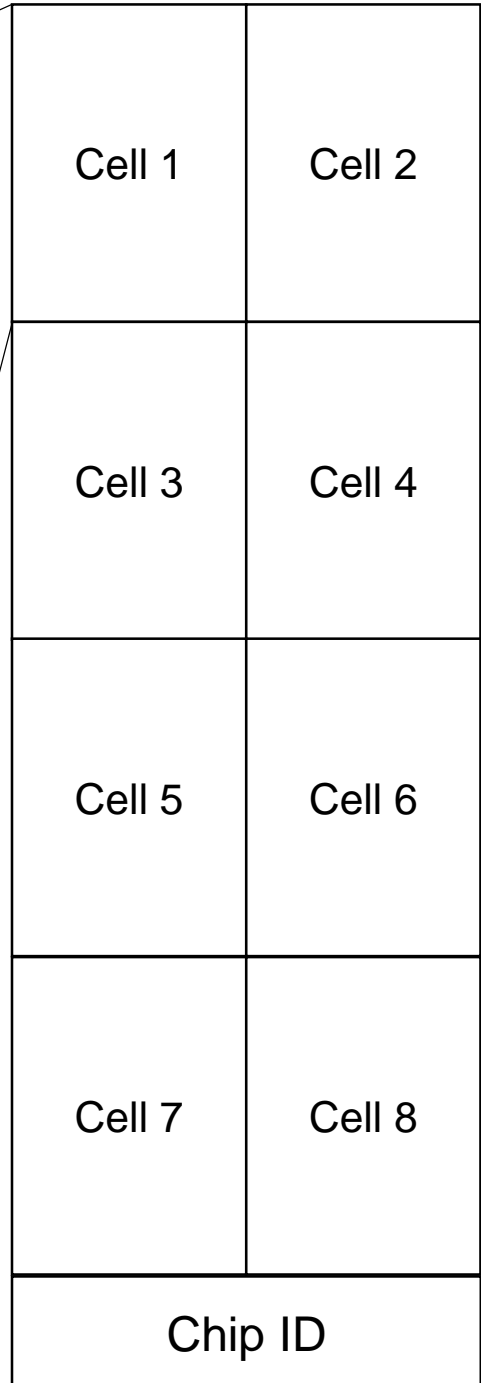

Supplement: 40064_2014_1507_MOESM2_ESM.pdf [file 40064_2014_1507_MOESM2_ESM.pdf]
